# Supplementary material for: Genome-Wide Analysis of PL7 Alginate Lyases in the Genus Zobellia
Source: MDPI journal article supplement (doi:10.3390/molecules26082387), 2021-04-20
Supplement: s1 [file s1]

# Supplementary materials

“Genome wide analysis of PL7 family alginate lyases in the genus *Zobellia*”

**Nadezhda Chernysheva, Evgeniya Bystritskaya, Galina Likhatskaya, Olga Nedashkovskaya, and Marina Isaeva \***

G.B. Elyakov Pacific Institute of Bioorganic Chemistry, Far Eastern Branch, Russian Academy of Sciences, 159, Pr. 100 let Vladivostoku, Vladivostok 690022, Russia; chernysheva.nadezhda@gmail.com (N.C.); belyjane@gmail.com (E.B.); galin56@mail.ru (G.N.); oned2004@mail.ru (O.N.)

\* Correspondence: issaeva@gmail.com (M.I.); Tel.: ++7-423-231-1168

Submitted to Molecules.

**Table S1.** List of accession numbers for genomes used in phylogenomic analysis.

| Strain                                                 | GenBank Accession No. |
|--------------------------------------------------------|-----------------------|
| <i>Zobellia uliginosa</i> DSM 2061 <sup>T</sup>        | FTOB000000000.1       |
| <i>Zobellia galactanivorans</i> DsiJ <sup>T</sup>      | FP476056.1            |
| <i>Zobellia galactanivorans</i> OII3                   | MWRZ000000000.1       |
| <i>Zobellia</i> sp. Asnod1-F08                         | JADDXT000000000.1     |
| <i>Zobellia</i> sp. Asnod2-B02-B                       | JADDXS000000000.1     |
| <i>Zobellia</i> sp. Asnod2-B07-B                       | JADDXR000000000.1     |
| <i>Zobellia</i> sp. Asnod3-E08-A                       | JADDXQ000000000.1     |
| <i>Zobellia laminariae</i> KMM 3676 <sup>T</sup>       | RCNS000000000.1       |
| ' <i>Zobellia barbeyronii</i> ' KMM 6746 <sup>T</sup>  | JACATN000000000.1*    |
| <i>Zobellia amurskyensis</i> KMM 3526 <sup>T</sup>     | RCNR000000000.1       |
| <i>Zobellia amurskyensis</i> MAR 2009 138              | JQMD000000000.1       |
| <i>Zobellia russellii</i> KMM 3677 <sup>T</sup>        | JACSOI000000000.1*    |
| <i>Arenibacter latericius</i> DSM 15913 <sup>T</sup>   | AUKX000000000.1       |
| <i>Maribacter sedimenticola</i> DSM 19840 <sup>T</sup> | FZNV000000000.1       |

\*Unpublished data

**Table S2.** Identity matrix of catalytic domains from PL7 alginate lyases identified in *Zobellia* genomes.**Table S3.** Identifiers of PL7 and adjacent genes included in loci I–VI.



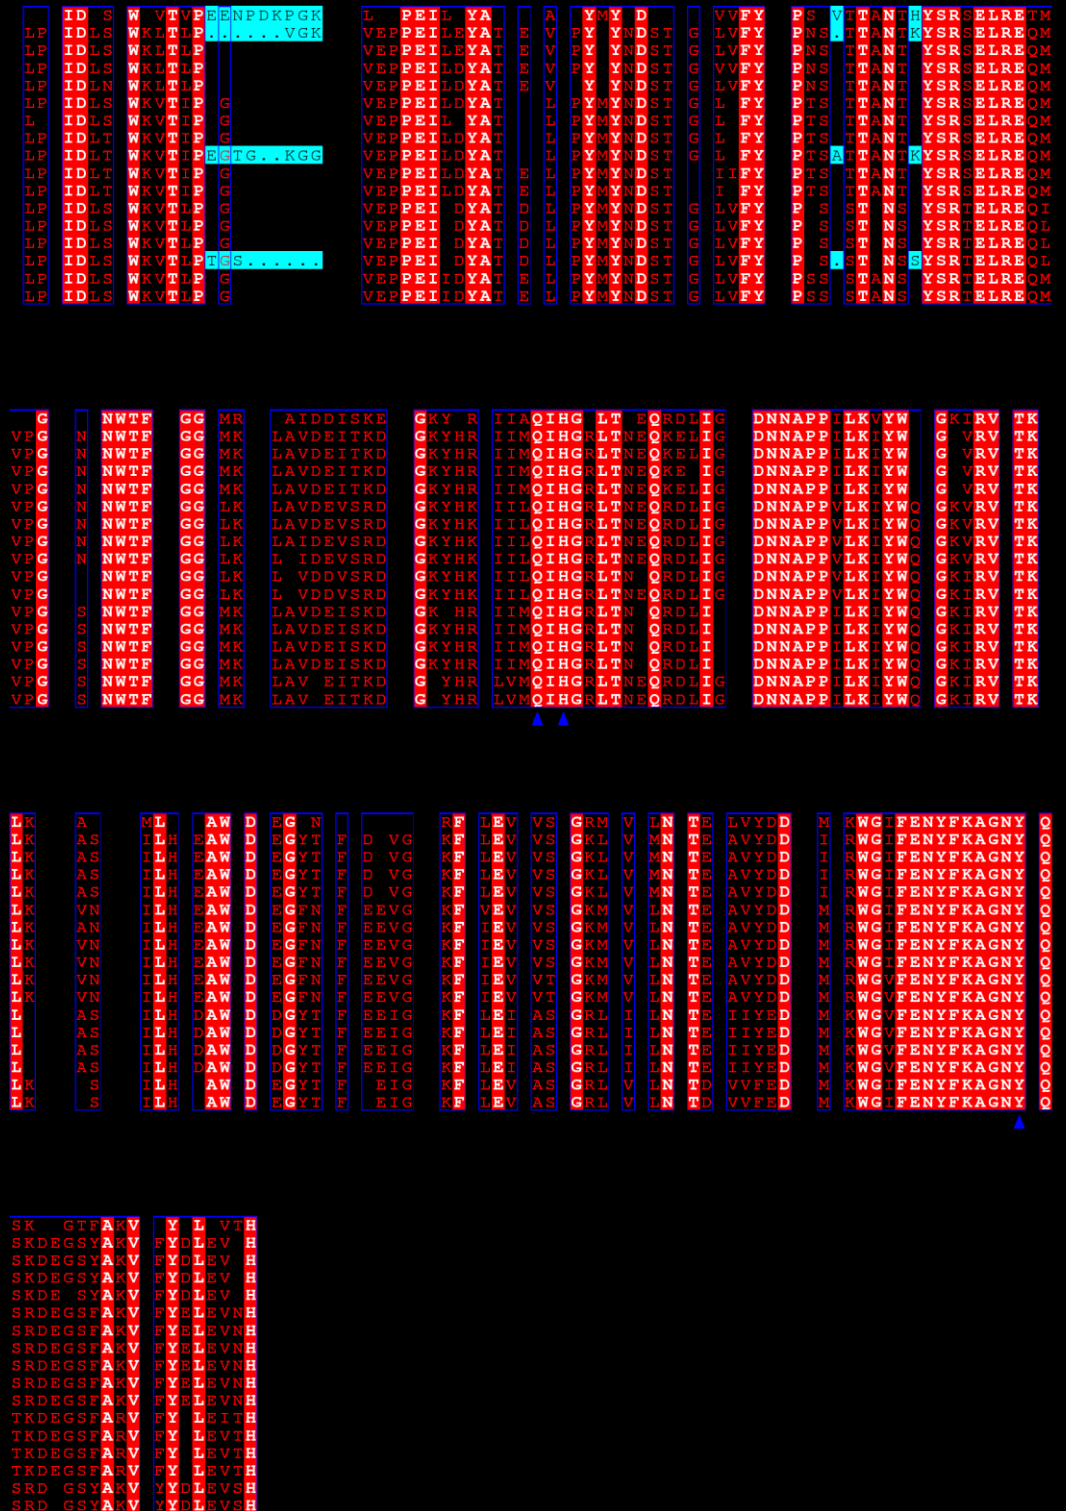

**Figure S2.** Structure-based sequence alignment of PL7 alginate lyases from subfamily SF6. The sequences are aligned using known structure, FlAlaA from *Flavobacterium* sp. UMI-01 (PDB ID: 5Y33). The secondary structures are shown above the alignment. Conserved amino acids in white letters highlighted on the red background are identical and those in red letters are similar.  $\alpha$ -Helices are represented as schematically, and  $\beta$ -turns are marked with TT. Blue triangles indicate the conserved residues involved in the catalytic machinery. The differences between in-paralogs, which were colored in ribbon representations of superimpositions are highlighted by cyan background.
