# Supplementary material for: Genome-Wide Analysis of PL7 Alginate Lyases in the Genus Zobellia
Source: Molecules. 2021 Apr 20;26(8):2387. doi: 10.3390/molecules26082387 (PMC8073546; doi:10.3390/molecules26082387)
Supplement: Supplementary file 1 [file molecules-26-02387-s001.zip]

Archive with 5 entries (5 files):
- FigS1_SF5_v2.tiff
- FigS2_SF6_v2.tiff
- Supplementary_file_v2.pdf
- TableS2_Identity_matrix_v2.xlsx
- TableS3_Locus_tags_v2.xlsx
