# Supplementary material for: Genome-Wide Analysis of PL7 Alginate Lyases in the Genus Zobellia
Source: Molecules. 2021 Apr 20;26(8):2387. doi: 10.3390/molecules26082387 (PMC8073546; doi:10.3390/molecules26082387)
Supplement: Supplementary file 1 [file molecules-26-02387-s001.zip › TableS2_Identity_matrix_v2.xlsx]

## Sheet: Identity_matrix
Table S2. Identity matrix of catalytic domains from PL7 alginate lyases identified in Zobellia genomes.
		1	2	3	4	5	6	7	8	9	10	11	12	13	14	15	16	17	18	19	20	21	22	23	24	25	26	27	28	29	30	31	32	33	34	35	36	37	38	39	40	41
		1	2	3	4	5	6	7	8	9	10	11	12	13	14	15	16	17	18	19	20	21	22	23	24	25	26	27	28	29	30	31	32	33	34	35	36	37	38	39	40	41
1	ZspE08A_193_5	100	98.58	93.62	94.33	90.32	90.07	90.43	66.79	66.43	66.07	66.43	65.71	66.07	66.43	66.79	66.07	69.64	67.86	67.86	16.58	20.21	20.21	20.73	20.73	20.21	25.37	24.88	24.88	24.88	26.37	25.87	21.94	22.96	22.96	22.45	22.45	22.45	22.96	22.96	23.47	23.47
2	ZspB07B_4008_5	98.58	100	93.62	94.33	89.61	90.07	90.43	66.79	66.43	66.07	66.43	65.71	66.07	66.43	66.79	66.07	68.93	67.86	67.86	17.1	20.21	20.21	20.73	20.73	20.21	25.37	24.88	24.88	24.88	26.37	25.87	21.94	22.96	22.96	22.45	21.94	21.94	22.45	22.45	22.96	22.96
3	ZlamT_D9V96_08075_5	93.62	93.62	100	95.74	91.04	89.36	89.36	65.36	65	64.64	66.79	66.07	65	64.64	65	64.29	67.5	66.43	66.43	16.58	19.69	19.69	20.21	20.21	19.69	25.37	24.38	24.88	24.88	26.37	25.87	22.96	23.98	23.98	23.47	22.45	22.45	22.96	22.96	23.47	23.47
4	ZbarT_HW347_07600*_5	94.33	94.33	95.74	100	88.89	88.3	88.65	66.07	65.36	65	66.07	65.36	65.36	65.71	65.71	65	67.86	66.07	66.07	15.54	19.17	19.17	19.69	19.69	19.17	25.87	25.37	25.37	25.37	26.87	26.37	22.45	23.47	23.47	22.96	22.45	22.45	21.94	21.94	22.45	22.45
5	ZrusT_H9565_12685*_5	90.32	89.61	91.04	88.89	100	91.76	93.19	65.34	64.98	64.62	65.7	65.34	64.98	64.98	65.7	64.98	67.51	66.06	66.06	17.37	20	20	20	20	19.47	24.75	24.75	23.74	23.74	25.25	24.75	22.05	23.08	23.08	22.56	23.08	23.08	23.08	23.08	23.08	23.08
6	ZamT_D9O36_13315_5	90.07	90.07	89.36	88.3	91.76	100	97.87	65.36	65	64.64	63.21	62.86	63.57	63.93	64.29	64.29	66.07	65.71	65.71	17.62	19.69	19.69	19.69	19.69	19.17	24.38	24.38	23.38	23.38	24.88	24.38	21.43	22.45	22.45	21.94	23.98	23.98	25	25	24.49	24.49
7	ZamMAR_848_5	90.43	90.43	89.36	88.65	93.19	97.87	100	67.14	66.79	66.43	64.64	64.29	65.36	65.71	66.07	66.07	67.86	67.14	67.14	18.65	20.21	20.21	20.21	20.21	19.69	24.88	24.88	23.88	23.88	25.37	24.88	21.94	22.96	22.96	22.45	22.96	22.96	23.98	23.98	23.98	23.98
8	ZuliT_SAMN05421766_103783_4	66.79	66.79	65.36	66.07	65.34	65.36	67.14	100	96.58	96.92	83.51	82.82	87.33	87.67	86.64	86.3	86.99	85.96	85.96	19.02	22.55	22.55	22.55	22.55	22.06	25	25	25	25	25.94	25.47	23.67	24.64	24.64	24.15	25.6	25.6	25.6	25.12	24.64	24.15
9	ZgalT_CAZ98266.1_AlyA5_4_structure	66.43	66.43	65	65.36	64.98	65	66.79	96.58	100	98.97	83.85	83.16	88.01	88.36	87.33	86.99	87.33	86.3	86.3	19.51	22.06	22.06	22.06	22.06	21.57	24.06	24.06	24.06	24.06	25	24.53	22.71	23.67	23.67	23.19	24.64	24.64	24.64	24.64	24.15	24.15
10	ZgalOII3_B4Q04_08515_4	66.07	66.07	64.64	65	64.62	64.64	66.43	96.92	98.97	100	83.85	83.16	88.01	88.36	87.33	87.33	87.33	86.64	86.64	19.51	22.55	22.55	22.55	22.55	22.06	23.58	23.58	23.58	23.58	24.53	24.06	22.71	23.67	23.67	23.19	24.64	24.64	24.64	24.64	24.15	23.67
11	ZspF08_350_4	66.43	66.43	66.79	66.07	65.7	63.21	64.64	83.51	83.85	83.85	100	98.28	88.66	88.32	87.63	86.94	89	86.6	86.6	20.1	22.17	22.17	22.17	22.17	21.67	24.64	24.64	24.17	24.17	25.59	25.12	24.27	26.21	26.21	25.73	26.21	26.21	25.24	25.73	25.73	25.73
12	ZspB02B_345_4	65.71	65.71	66.07	65.36	65.34	62.86	64.29	82.82	83.16	83.16	98.28	100	87.97	87.63	86.25	85.57	87.63	85.22	85.57	20.1	22.17	22.17	22.17	22.17	21.67	24.64	24.64	24.17	24.17	25.59	25.12	24.27	26.21	26.21	25.73	26.21	26.21	25.24	25.73	25.73	25.73
13	ZspE08A_836_4	66.07	66.07	65	65.36	64.98	63.57	65.36	87.33	88.01	88.01	88.66	87.97	100	99.32	98.29	97.26	89.73	90.75	91.1	19.51	21.08	21.08	21.08	21.08	20.59	24.06	24.06	23.11	23.11	24.53	24.06	23.67	25.6	25.6	25.12	27.05	27.05	24.64	24.64	24.64	24.64
14	ZspB07B_3134_4	66.43	66.43	64.64	65.71	64.98	63.93	65.71	87.67	88.36	88.36	88.32	87.63	99.32	100	98.29	97.26	90.07	90.75	91.1	20	21.08	21.08	21.08	21.08	20.59	24.53	24.53	23.58	23.58	25	24.53	23.67	25.6	25.6	25.12	27.05	27.05	24.64	24.64	24.64	24.64
15	ZlamT_D9V96_12345_4	66.79	66.79	65	65.71	65.7	64.29	66.07	86.64	87.33	87.33	87.63	86.25	98.29	98.29	100	98.97	90.41	91.44	91.78	19.51	21.08	21.08	21.08	21.08	20.59	24.06	24.06	23.11	23.11	24.53	24.06	23.67	25.6	25.6	25.12	27.05	27.05	24.64	24.64	24.64	24.64
16	ZbarT_HW347_16950*_4	66.07	66.07	64.29	65	64.98	64.29	66.07	86.3	86.99	87.33	86.94	85.57	97.26	97.26	98.97	100	90.07	92.47	92.81	19.51	21.08	21.08	21.08	21.08	20.59	23.58	23.58	22.64	22.64	24.06	23.58	23.19	25.12	25.12	24.64	26.57	26.57	24.15	24.15	24.15	24.15
17	ZrusT_H9565_12680*_4	69.64	68.93	67.5	67.86	67.51	66.07	67.86	86.99	87.33	87.33	89	87.63	89.73	90.07	90.41	90.07	100	92.47	93.15	19.51	20.1	20.1	20.1	20.1	19.61	24.53	24.53	24.06	24.06	25.47	25	23.67	25.6	25.6	25.12	26.09	26.09	25.12	25.12	25.12	25.12
18	ZamT_D9O36_13320_4	67.86	67.86	66.43	66.07	66.06	65.71	67.14	85.96	86.3	86.64	86.6	85.22	90.75	90.75	91.44	92.47	92.47	100	98.63	19.02	21.08	21.08	21.08	21.08	20.59	24.06	24.06	23.58	23.58	25	24.53	23.67	25.6	25.6	25.12	25.6	25.6	25.12	25.12	25.12	25.12
19	ZamMAR_847_4	67.86	67.86	66.43	66.07	66.06	65.71	67.14	85.96	86.3	86.64	86.6	85.57	91.1	91.1	91.78	92.81	93.15	98.63	100	19.02	21.08	21.08	21.08	21.08	20.59	24.06	24.06	23.58	23.58	25	24.53	23.67	25.6	25.6	25.12	25.6	25.6	25.12	25.12	25.12	25.12
20	ZbarT_HW347_10210*_3	16.58	17.1	16.58	15.54	17.37	17.62	18.65	19.02	19.51	19.51	20.1	20.1	19.51	20	19.51	19.51	19.51	19.02	19.02	100	26.5	26.5	26.5	26.5	26	25.23	25.23	24.32	24.77	24.32	24.32	25.81	25.35	25.35	25.35	24.88	24.88	22.58	23.04	23.5	23.5
21	ZspE08A_2582_3	20.21	20.21	19.69	19.17	20	19.69	20.21	22.55	22.06	22.55	22.17	22.17	21.08	21.08	21.08	21.08	20.1	21.08	21.08	26.5	100	99.57	94.04	94.04	93.62	25	25	25.45	25.45	25.91	25.91	28.84	29.3	29.3	29.3	30.23	30.23	29.77	30.7	30.23	29.77
22	ZspB07B_1744_3	20.21	20.21	19.69	19.17	20	19.69	20.21	22.55	22.06	22.55	22.17	22.17	21.08	21.08	21.08	21.08	20.1	21.08	21.08	26.5	99.57	100	94.47	94.47	94.04	25	25	25.45	25.45	25.91	25.91	28.84	29.3	29.3	29.3	30.23	30.23	29.77	30.7	30.23	29.77
23	ZgalT_CAZ95239.1_AlyA1_3_structure	20.73	20.73	20.21	19.69	20	19.69	20.21	22.55	22.06	22.55	22.17	22.17	21.08	21.08	21.08	21.08	20.1	21.08	21.08	26.5	94.04	94.47	100	100	99.15	24.09	24.09	24.55	24.55	25	25	28.37	28.84	28.84	28.84	30.7	30.7	29.3	30.23	29.77	29.3
24	ZgalOII3_B4Q04_01045_3	20.73	20.73	20.21	19.69	20	19.69	20.21	22.55	22.06	22.55	22.17	22.17	21.08	21.08	21.08	21.08	20.1	21.08	21.08	26.5	94.04	94.47	100	100	99.15	24.09	24.09	24.55	24.55	25	25	28.37	28.84	28.84	28.84	30.7	30.7	29.3	30.23	29.77	29.3
25	ZuliT_SAMN05421766_101793_3	20.21	20.21	19.69	19.17	19.47	19.17	19.69	22.06	21.57	22.06	21.67	21.67	20.59	20.59	20.59	20.59	19.61	20.59	20.59	26	93.62	94.04	99.15	99.15	100	23.64	23.64	24.09	24.09	24.55	24.55	28.37	28.84	28.84	28.84	29.77	29.77	28.84	29.77	29.3	28.84
26	ZamMAR_4142_1	25.37	25.37	25.37	25.87	24.75	24.38	24.88	25	24.06	23.58	24.64	24.64	24.06	24.53	24.06	23.58	24.53	24.06	24.06	25.23	25	25	24.09	24.09	23.64	100	98.81	91.27	90.87	92.06	91.27	68.42	67.61	67.61	67.61	59.92	59.92	58.7	59.92	59.92	59.51
27	ZamT_D9O36_02730_1	24.88	24.88	24.38	25.37	24.75	24.38	24.88	25	24.06	23.58	24.64	24.64	24.06	24.53	24.06	23.58	24.53	24.06	24.06	25.23	25	25	24.09	24.09	23.64	98.81	100	90.08	89.68	90.87	90.08	67.61	66.8	66.8	66.8	59.92	59.92	59.11	60.32	60.32	59.92
28	ZspE08A_3940_1	24.88	24.88	24.88	25.37	23.74	23.38	23.88	25	24.06	23.58	24.17	24.17	23.11	23.58	23.11	22.64	24.06	23.58	23.58	24.32	25.45	25.45	24.55	24.55	24.09	91.27	90.08	100	99.21	96.83	96.43	69.23	68.83	68.83	68.42	61.54	61.54	59.11	60.73	61.13	60.73
29	ZspB07B_377_1	24.88	24.88	24.88	25.37	23.74	23.38	23.88	25	24.06	23.58	24.17	24.17	23.11	23.58	23.11	22.64	24.06	23.58	23.58	24.77	25.45	25.45	24.55	24.55	24.09	90.87	89.68	99.21	100	96.83	96.43	69.23	68.83	68.83	68.42	61.94	61.94	59.51	61.13	61.54	61.13
30	ZlamT_D9V96_01890_1	26.37	26.37	26.37	26.87	25.25	24.88	25.37	25.94	25	24.53	25.59	25.59	24.53	25	24.53	24.06	25.47	25	25	24.32	25.91	25.91	25	25	24.55	92.06	90.87	96.83	96.83	100	97.62	70.45	70.45	70.45	70.04	62.75	62.75	60.32	61.94	62.35	61.94
31	ZbarT_HW347_13495*_1	25.87	25.87	25.87	26.37	24.75	24.38	24.88	25.47	24.53	24.06	25.12	25.12	24.06	24.53	24.06	23.58	25	24.53	24.53	24.32	25.91	25.91	25	25	24.55	91.27	90.08	96.43	96.43	97.62	100	70.45	70.85	70.85	70.04	61.94	61.94	59.92	61.54	61.94	61.54
32	ZrusT_H9565_05980*_1	21.94	21.94	22.96	22.45	22.05	21.43	21.94	23.67	22.71	22.71	24.27	24.27	23.67	23.67	23.67	23.19	23.67	23.67	23.67	25.81	28.84	28.84	28.37	28.37	28.37	68.42	67.61	69.23	69.23	70.45	70.45	100	95.55	95.55	95.55	67.21	67.61	63.16	63.97	63.97	63.97
33	ZgalT_ZOBELLIA_2618_AlyA2_1	22.96	22.96	23.98	23.47	23.08	22.45	22.96	24.64	23.67	23.67	26.21	26.21	25.6	25.6	25.6	25.12	25.6	25.6	25.6	25.35	29.3	29.3	28.84	28.84	28.84	67.61	66.8	68.83	68.83	70.45	70.85	95.55	100	100	97.57	68.42	68.83	64.78	65.59	65.59	65.59
34	ZgalOII3_B4Q04_17445_1	22.96	22.96	23.98	23.47	23.08	22.45	22.96	24.64	23.67	23.67	26.21	26.21	25.6	25.6	25.6	25.12	25.6	25.6	25.6	25.35	29.3	29.3	28.84	28.84	28.84	67.61	66.8	68.83	68.83	70.45	70.85	95.55	100	100	97.57	68.42	68.83	64.78	65.59	65.59	65.59
35	ZuliT_SAMN05421766_104406_1	22.45	22.45	23.47	22.96	22.56	21.94	22.45	24.15	23.19	23.19	25.73	25.73	25.12	25.12	25.12	24.64	25.12	25.12	25.12	25.35	29.3	29.3	28.84	28.84	28.84	67.61	66.8	68.42	68.42	70.04	70.04	95.55	97.57	97.57	100	68.02	68.42	64.37	65.18	65.18	65.18
36	ZamT_D9O36_02725_2	22.45	21.94	22.45	22.45	23.08	23.98	22.96	25.6	24.64	24.64	26.21	26.21	27.05	27.05	27.05	26.57	26.09	25.6	25.6	24.88	30.23	30.23	30.7	30.7	29.77	59.92	59.92	61.54	61.94	62.75	61.94	67.21	68.42	68.42	68.02	100	98.79	78.95	80.97	80.97	80.97
37	ZamMAR_4141_2	22.45	21.94	22.45	22.45	23.08	23.98	22.96	25.6	24.64	24.64	26.21	26.21	27.05	27.05	27.05	26.57	26.09	25.6	25.6	24.88	30.23	30.23	30.7	30.7	29.77	59.92	59.92	61.54	61.94	62.75	61.94	67.61	68.83	68.83	68.42	98.79	100	79.76	81.38	81.38	81.78
38	ZlamT_D9V96_01895_2	22.96	22.45	22.96	21.94	23.08	25	23.98	25.6	24.64	24.64	25.24	25.24	24.64	24.64	24.64	24.15	25.12	25.12	25.12	22.58	29.77	29.77	29.3	29.3	28.84	58.7	59.11	59.11	59.51	60.32	59.92	63.16	64.78	64.78	64.37	78.95	79.76	100	96.36	94.74	95.14
39	ZbarT_HW347_13500*_2	22.96	22.45	22.96	21.94	23.08	25	23.98	25.12	24.64	24.64	25.73	25.73	24.64	24.64	24.64	24.15	25.12	25.12	25.12	23.04	30.7	30.7	30.23	30.23	29.77	59.92	60.32	60.73	61.13	61.94	61.54	63.97	65.59	65.59	65.18	80.97	81.38	96.36	100	97.57	97.17
40	ZspE08A_3939_2	23.47	22.96	23.47	22.45	23.08	24.49	23.98	24.64	24.15	24.15	25.73	25.73	24.64	24.64	24.64	24.15	25.12	25.12	25.12	23.5	30.23	30.23	29.77	29.77	29.3	59.92	60.32	61.13	61.54	62.35	61.94	63.97	65.59	65.59	65.18	80.97	81.38	94.74	97.57	100	98.79
41	ZspB07B_378_2	23.47	22.96	23.47	22.45	23.08	24.49	23.98	24.15	24.15	23.67	25.73	25.73	24.64	24.64	24.64	24.15	25.12	25.12	25.12	23.5	29.77	29.77	29.3	29.3	28.84	59.51	59.92	60.73	61.13	61.94	61.54	63.97	65.59	65.59	65.18	80.97	81.78	95.14	97.17	98.79	100
Color	The amino acid sequence identities of PL7 catalytic domains between in-paralogs, orthologs, and out-paralogs
	PL7-SF5
	PL7-SF3
	PL7-SF6
* Identifiers from unpublished genomes are marked with asterisks
