# Supplementary material for: Genome-Wide Analysis of PL7 Alginate Lyases in the Genus Zobellia
Source: Molecules. 2021 Apr 20;26(8):2387. doi: 10.3390/molecules26082387 (PMC8073546; doi:10.3390/molecules26082387)
Supplement: Supplementary file 1 [file molecules-26-02387-s001.zip › TableS3_Locus_tags_v2.xlsx]

## Sheet: Лист1
Table S3. Identifiers of PL7 and adjacent genes included in loci I–VI
Strain	Locus number	Location	Gene	Locus tag	Frame orientation	Putative function as annotated by NCBI
Zobellia galactanivorans DsijT	I	FP476056		ZOBELLIA_2612	-	Manganese/fer transporter
			pfp	ZOBELLIA_2613	-	Diphosphate-fructose-6-phosphat 1-phosphotransferase
			kdgK1	ZOBELLIA_2614	-	2-dehydro-3-deoxygluconokinase
				ZOBELLIA_2615	-	Acetoin(diacetyl) reductase
				ZOBELLIA_2616	-	Sugar permease
				ZOBELLIA_2617	-	GntR-type transcriptional regulator
			alyA2	ZOBELLIA_2618	-	Alginate lyase, family PL7
				ZOBELLIA_2619	-	Conserved hypothetical lipoprotein
				ZOBELLIA_2620	-	SusD/RagB family lipoprotein
				ZOBELLIA_2621	-	TonB-dependent Receptor
				ZOBELLIA_2622	-	Short-chain dehydrogenase/reductase
			kdgF	ZOBELLIA_2623	-	Pectin degradation protein KdgF
			alyA3	ZOBELLIA_2624	-	Alginate lyase, family PL17
	II		alyA4	ZOBELLIA_4130	+	Alginate lyase, family PL6
			alyA5	ZOBELLIA_4131	+	Alginate lyase, family PL7
			alyA6	ZOBELLIA_4132	+	Alginate lyase, family PL6
	V		msrA2	ZOBELLIA_1181	+	Peptide methionine sulfoxide reductase msrA
			alyA1	ZOBELLIA_1182	+	Alginate lyase, family PL7
				ZOBELLIA_1183	-	Carboxy-terminal processing peptidase, family S41
Zobellia galactanivorans OII3	I	MWRZ01000008		B4Q04_17415	+	heparinase
				B4Q04_17420	+	cupin
				B4Q04_17425	+	oxidoreductase
				B4Q04_17430	+	SusC/RagA family TonB-linked outer membrane protein
				B4Q04_17435	+	RagB/SusD family nutrient uptake outer membrane protein
				B4Q04_17440	+	PKD domain-containing protein
			PL7sf6_1	B4Q04_17445	+	polysaccharide lyase family 7 protein
				B4Q04_17450	+	GntR family transcriptional regulator
				B4Q04_17455	+	MFS transporter
				B4Q04_17460	+	short-chain dehydrogenase
				B4Q04_17465	+	2-dehydro-3-deoxygluconokinase
				B4Q04_17470	+	6-phosphofructokinase
				B4Q04_17475	+	iron transporter
	II	MWRZ01000002		B4Q04_08510	+	alginate lyase
			PL7sf5_4	B4Q04_08515	+	polysaccharide lyase family 7 protein
				B4Q04_08520	+	alginate lyase
	V	MWRZ01000001		B4Q04_01040	+	peptide methionine sulfoxide reductase
			PL7sf3_3	B4Q04_01045	+	hypothetical protein
				B4Q04_01050	-	tail-specific protease
Zobellia uliginosa DSM 2061T	I	FTOB01000004		SAMN05421766_104400	-	Mn2+ and Fe2+ transporters of the NRAMP family
				SAMN05421766_104401	-	6-phosphofructokinase 1
				SAMN05421766_104402	-	2-dehydro-3-deoxygluconokinase
				SAMN05421766_104403	-	NAD(P)-dependent dehydrogenase, short-chain alcohol dehydrogenase family
				SAMN05421766_104404	-	MFS transporter, ACS family, hexuronate transporter
				SAMN05421766_104405	-	transcriptional regulator, GntR family
			ZuliT_PL7sf6_1	SAMN05421766_104406	-	Alginate lyase
				SAMN05421766_104407	-	PKD domain-containing protein
				SAMN05421766_104408	-	Starch-binding associating with outer membrane
				SAMN05421766_104409	-	TonB-linked outer membrane protein, SusC/RagA family
				SAMN05421766_104410	-	3-oxoacyl-[acyl-carrier protein] reductase
				SAMN05421766_104411	-	Cupin domain-containing protein
				SAMN05421766_104412	-	Alginate lyase
	II	FTOB01000003		SAMN05421766_103782	-	poly(beta-D-mannuronate) lyase
			ZuliT_PL7sf5_4	SAMN05421766_103783	-	Alginate lyase
				SAMN05421766_103784	-	poly(beta-D-mannuronate) lyase
	V	FTOB01000001		SAMN05421766_101792	+	carboxyl-terminal processing protease
			ZuliT_PL7sf3_3	SAMN05421766_101793	-	F5/8 type C domain-containing protein
				SAMN05421766_101794	-	peptide-methionine (S)-S-oxide reductase
Zobellia russellii KMM 3677T	I	NODE_2		H9565_05955	+	alginate lyase family protein
				H9565_05960	+	cupin domain-containing protein
				H9565_05965	+	TonB-dependent receptor
				H9565_05970	+	RagB/SusD family nutrient uptake outer membrane protein
				H9565_05975	+	PKD domain-containing protein
			ZrusT_PL7sf6_1	H9565_05980	+	polysaccharide lyase family 7 protein
				H9565_05985	+	FadR family transcriptional regulator
				H9565_05990	+	MFS transporter
				H9565_05995	+	SDR family oxidoreductase
				H9565_06000	+	sugar kinase
				H9565_06005	+	6-phosphofructokinase
				H9565_06010	+	divalent metal cation transporter
	II	NODE_5		H9565_12675	+	DUF4957 domain-containing protein
			Zrus_PL7sf5_4	H9565_12680	+	polysaccharide lyase family 7 protein
			Zrus_PL7sf5_5	H9565_12685	+	polysaccharide lyase family 7 protein
				H9565_12690	+	3-oxoacyl-ACP reductase FabG
Zobellia laminariae KMM 3676T	I	RCNS01000001		D9V96_01865	+	heparinase
				D9V96_01870	-	cupin domain-containing protein
				D9V96_01875	+	TonB-dependent receptor
				D9V96_01880	+	RagB/SusD family nutrient uptake outer membrane protein
				D9V96_01885	+	PKD domain-containing protein
			ZlamT_PL7sf6_1	D9V96_01890	+	polysaccharide lyase family 7 protein
			ZlamT_PL7sf6_2	D9V96_01895	+	polysaccharide lyase family 7 protein
				D9V96_01900	+	FadR family transcriptional regulator
				D9V96_01905	+	DUF4957 domain-containing protein
				D9V96_01910	+	divalent metal cation transporter
				D9V96_01915	+	TonB-dependent receptor
				D9V96_01920	+	RagB/SusD family nutrient uptake outer membrane protein
				D9V96_01925	+	FadR family transcriptional regulator
				D9V96_01930	+	MFS transporter
				D9V96_01935	+	SDR family oxidoreductase
				D9V96_01940	-	LacI family transcriptional regulator
				D9V96_01945	+	sugar kinase
				D9V96_01950	+	6-phosphofructokinase
				D9V96_01955	+	bifunctional 4-hydroxy-2-oxoglutarate aldolase/2-dehydro-3-deoxy-phosphogluconate aldolase
	II	RCNS01000002		D9V96_12340	-	DUF4957 domain-containing protein
			ZlamT_PL7sf5_4	D9V96_12345	-	polysaccharide lyase family 7 protein
				D9V96_12350	-	alginate lyase
	IV			D9V96_08070	-	MOSC domain-containing protein
			ZlamT_PL7sf5_5	D9V96_08075	-	polysaccharide lyase family 7 protein
				D9V96_08080	-	PIG-L family deacetylase
‘Zobellia barbeyronii' KMM 6746T	I	NODE_4		HW347_13470	+	alginate lyase family protein
				HW347_13475	-	cupin domain-containing protein
				HW347_13480	+	TonB-dependent receptor
				HW347_13485	+	RagB/SusD family nutrient uptake outer membrane protein
				HW347_13490	+	PKD domain-containing protein
			ZbarT_PL7sf6_1	HW347_13495	+	polysaccharide lyase family 7 protein
			ZbarT_PL7sf6_2	HW347_13500	+	polysaccharide lyase family 7 protein
				HW347_13505	+	FadR family transcriptional regulator
				HW347_13510	+	alginate lyase
				HW347_13515	+	Nramp family divalent metal transporter
				HW347_13520	+	TonB-dependent receptor
				HW347_13525	+	RagB/SusD family nutrient uptake outer membrane protein
				HW347_13530	+	FadR family transcriptional regulator
				HW347_13535	+	MFS transporter
				HW347_13540	+	SDR family oxidoreductase
				HW347_13545	+	LacI family DNA-binding transcriptional regulator
				HW347_13550	+	sugar kinase
				HW347_13555	+	6-phosphofructokinase
				HW347_13560	+	bifunctional 4-hydroxy-2-oxoglutarate aldolase/2-dehydro-3-deoxy-phosphogluconate aldolase
	II	NODE_5		HW347_16945	+	DUF4957 domain-containing protein
			ZbarT_PL7sf5_4	HW347_16950	+	polysaccharide lyase family 7 protein
				HW347_16955	+	alginate lyase
	IV	NODE_2		HW347_07595	+	PIG-L family deacetylase
			ZbarT_PL7sf5_5	HW347_07600	+	polysaccharide lyase family 7 protein
				HW347_07605	+	MOSC domain-containing protein
	VI	NODE_3		HW347_10205	+	aminopeptidase P N-terminal domain-containing protein
			Zbar_PL7sf3_3	HW347_10210	-	carbohydrate-binding protein
				HW347_10215	-	glycine cleavage system aminomethyltransferase GcvT
Zobellia amurskyensis KMM 3526T	I	RCNR0100000		D9O36_02665	-	bifunctional 4-hydroxy-2-oxoglutarate aldolase/2-dehydro-3-deoxy-phosphogluconate aldolase
				D9O36_02670	-	6-phosphofructokinase
				D9O36_02675	-	sugar kinase
				D9O36_02680	+	LacI family transcriptional regulator
				D9O36_02685	-	SDR family oxidoreductase
				D9O36_02690	-	MFS transporter
				D9O36_02695	-	FadR family transcriptional regulator
				D9O36_02700	-	RagB/SusD family nutrient uptake outer membrane protein
				D9O36_02705	-	TonB-dependent receptor
				D9O36_02710	-	divalent metal cation transporter
				D9O36_02715	-	DUF4957 domain-containing protein
				D9O36_02720	-	FadR family transcriptional regulator
			ZamT_PL7sf6_2	D9O36_02725	-	polysaccharide lyase family 7 protein
			ZamT_PL7sf6_1	D9O36_02730	-	polysaccharide lyase family 7 protein
				D9O36_02735	-	hypothetical protein
				D9O36_02740	-	PKD domain-containing protein
				D9O36_02745	-	RagB/SusD family nutrient uptake outer membrane protein
				D9O36_02750	-	TonB-dependent receptor
				D9O36_02755	+	cupin domain-containing protein
				D9O36_02760	-	heparinase
	II	RCNR01000025		D9O36_13300	-	DUF4957 domain-containing protein
				D9O36_13305	-	transporter
				D9O36_13310	-	glucose 1-dehydrogenase
			ZamT_PL7sf5_5	D9O36_13315	-	polysaccharide lyase family 7 protein
			ZamT_PL7sf5_4	D9O36_13320	-	polysaccharide lyase family 7 protein
				D9O36_13325	-	alginate lyase
